# Supplementary material
Source: PubMed Central journal article supplement (PMC3233523)
Supplement: cc0914_2897SD1.pdf [file cc0914_2897SD1.pdf]

## Supplemental Materials

### Pharicin A, an ent-kaurene diterpenoid, induces a novel mitotic arrest with therapeutic potential in paclitaxel-resistant cancer cells

Han-Zhang XU, Ying HUANG, Ying-Li WU, Yong ZHAO, Wei-Lie XIAO, Yi-Xin Yao, Qi-Shan Lin,

Han-Dong SUN, Wei DAI, and Guo-Qiang CHEN

**Supplemental Table 1.**  $^1\text{H}$  and  $^{13}\text{C}$  NMR data of pharicin A (in  $\text{CDCl}_3$ ,  $\delta$  in ppm,  $J$  in Hz)

| Carbon. | $\delta_{\text{H}}$                               | $\delta_{\text{C}}$ | Carbon | $\delta_{\text{H}}$          | $\delta_{\text{C}}$ |
|---------|---------------------------------------------------|---------------------|--------|------------------------------|---------------------|
| 1       | 1.30 (1H, td, 3.2, 13.4)<br>1.44 (1H, br d, 12.9) | 32.8 t              | 13     | 3.11 (1H, d, 3.2)            | 53.8 d              |
| 2       | 1.61 (1H, overlapped)<br>1.88 (1H, m)             | 22.5 t              | 14     | 5.19 (1H, s)                 | 69.6 d              |
| 3       | 4.63 (1H, s)                                      | 77.3 d              | 15     |                              | 205.7 s             |
| 4       |                                                   | 36.6 s              | 16     |                              | 144.1 s             |
| 5       | 1.53 (1H, overlapped)                             | 46.7 d              | 17     | 6.15 (1H, s)<br>5.43 (1H, s) | 119.5 t             |
| 6       | 1.64 (2H, overlapped)                             | 25.0 t              | 18     | 0.87 (3H, s)                 | 27.8 q              |
| 7       | 5.52 (1H, dd, 11.8, 4.2)                          | 76.4 d              | 19     | 0.90 (3H, s)                 | 21.5 q              |
| 8       |                                                   | 60.9 s              | 20     | 1.29 (3H, s)                 | 15.6 q              |
| 9       | 1.61 (1H, overlapped)                             | 55.8 d              | OAc    | 2.05 (3H, s)                 | 170.6 s             |
| 10      |                                                   | 38.3 s              |        |                              | 21.2 q              |
| 11      | 1.96 (1H, dd, 11.6, 3.6)<br>1.62 (1H, overlapped) | 24.5 t              | OAc    | 1.99 (3H, s)                 | 168.1 s             |
| 12      | 4.09 (1H, brs)                                    | 72.0 d              |        |                              | 21.2 q              |

**Notes:** Pharicin A, obtained as white amorphous powder, had the molecular formula of C<sub>24</sub>H<sub>34</sub>O<sub>7</sub>. Its HRESIMS (*m/z* 457.2191 [M + Na]<sup>+</sup>, calculated 457.2202) indicated eight degrees of unsaturation. IR absorptions at 3383 and 1726, and 1647 cm<sup>-1</sup> implied the presence of hydroxyl, carbonyl groups, and  $\alpha,\beta$ -unsaturated ketone, respectively. The <sup>13</sup>C NMR spectrum of **1** displayed 24 carbon signals. Besides the resonances of two acetyl ( $\delta_C$  170.6, s, 168.1, s, 21.2, q, 21.2, q), other resonances corresponded to three methyls, five methylenes (including a sp<sup>2</sup> one), seven methines (including four oxygenated ones), five quaternary carbons (including two sp<sup>2</sup> ones). These lines of evidence indicated that this compound possessed an *ent*-kaurane diterpenoid skeleton.

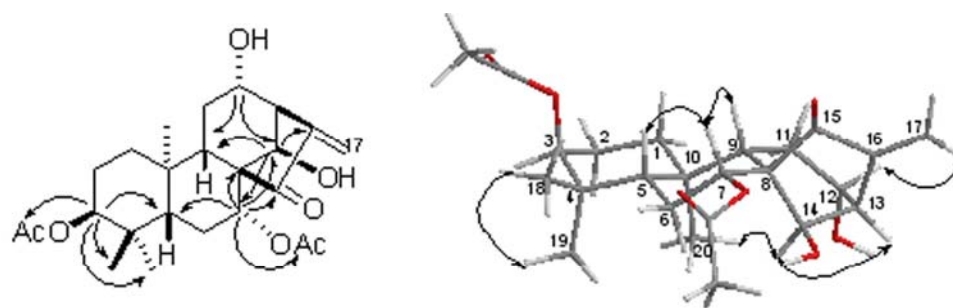

HMBC : H  $\curvearrowright$  C ROESY : H  $\curvearrowright$  H

Key HMBC and ROESY correlations of pharicin A

**Figure S1.** Key HMBC and ROESY correlations of Pharicin A. The HMBC correlations from H-3 ( $\delta_{\text{H}}$  4.63) to C-1 ( $\delta_{\text{C}}$  32.8), C-5 ( $\delta_{\text{C}}$  46.7) and C-19 ( $\delta_{\text{C}}$  21.5), from H-7 ( $\delta_{\text{H}}$  5.52, dd,  $J = 11.8, 4.2$  Hz) to C-8 ( $\delta_{\text{C}}$  60.9), C-14 ( $\delta_{\text{C}}$  69.6) and C-15 ( $\delta_{\text{C}}$  205.7), from H-12 ( $\delta_{\text{H}}$  4.09) to C-9 ( $\delta_{\text{C}}$  55.8) and C-14 ( $\delta_{\text{C}}$  69.6), and from H-14 ( $\delta_{\text{H}}$  5.19) to C-7 ( $\delta_{\text{C}}$  76.4), C-15 ( $\delta_{\text{C}}$  205.7) and C-16 ( $\delta_{\text{C}}$  144.1), indicated the presence of four oxygenated methines that were located at C-3, C-7, C-12, and C-14, respectively. In addition, according to HMBC cross-peaks of H-3 ( $\delta_{\text{H}}$  4.63) with OAc ( $\delta_{\text{C}}$  170.6) and of H-7 ( $\delta_{\text{H}}$  5.52) with OAc ( $\delta_{\text{C}}$  168.1), two acetoxy groups were determined to be placed at C-3 and C-7, respectively. The relative configuration of pharicin A was established on the basis of ROESY correlations of H-3/H-19, H-7/H-5 $\beta$  and H-9 $\beta$ , H-12/H-9 $\beta$  and H-17 $\alpha$ , H-14/H-13 $\alpha$  and Me-20 as shown, which revealed substitution groups of C-3, C-7, C-12, and C-14 were  $\beta$ ,  $\alpha$ ,  $\alpha$ ,  $\beta$ -orientations, respectively. Thus, this compound was unambiguously identified as  $3\beta$ ,  $7\alpha$ -diacetoxy- $12\alpha$ , $14\beta$ -dihydroxy-*ent*-kaur-16-en-15-one.

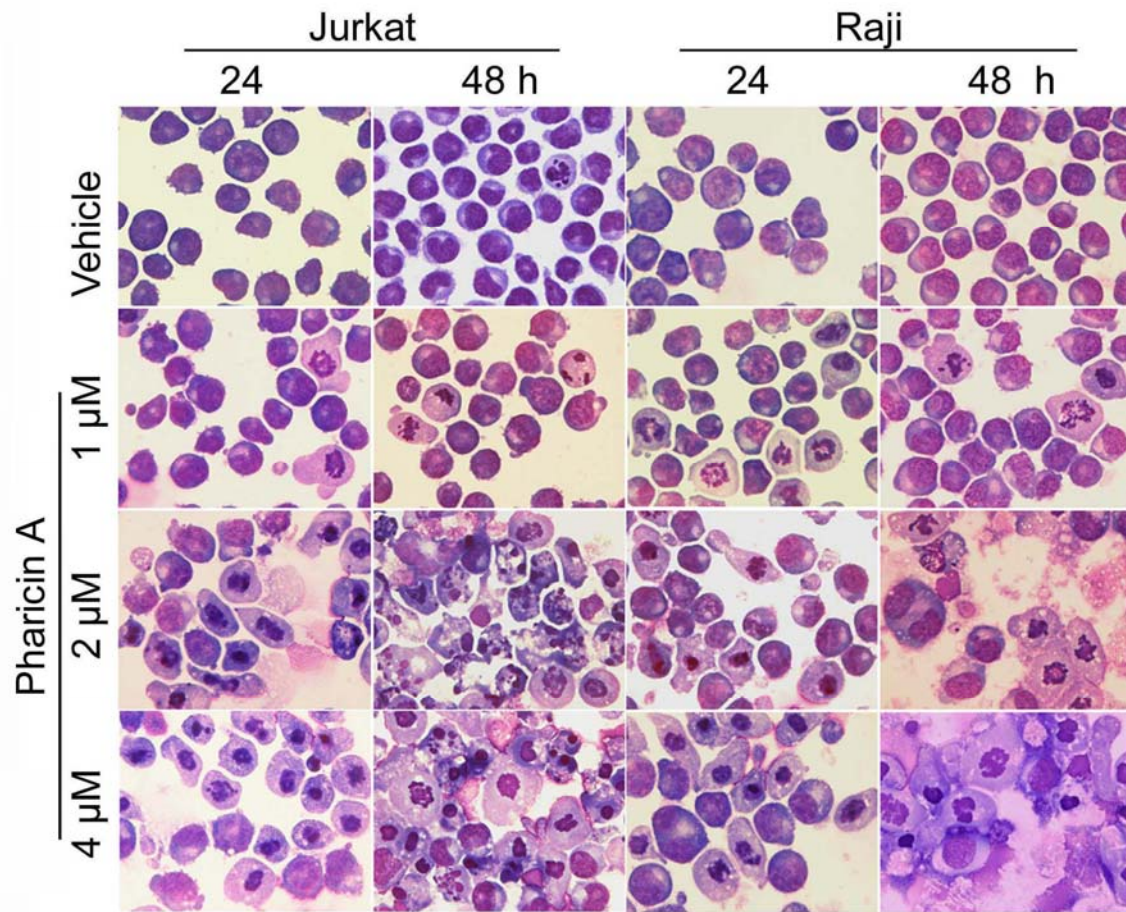

**Figure S2.** Pharicin A induces mitotic arrest in Jurkat and Raji Cells. After treatment with 1, 2, and 4  $\mu\text{M}$  of pharicin A for 24 or 48 h, Jurkat and Raji cells were collected onto slides by cytopspin, stained with Wright-Giemsa dye, and examined under an Olympus B $\times$ 60 microscope equipped with a 100 $\times$ /1.3 objective lens. Representative images were shown.
